# Supplementary material for: The Anti-SARS-CoV-2 IgG1 and IgG3 Antibody Isotypes with Limited Neutralizing Capacity against Omicron Elicited in a Latin Population Switch toward IgG4 after Multiple Doses with the mRNA Pfizer-BioNTech Vaccine.
Source: Preprints.org preprint supplement (doi:10.20944/preprints202401.0815.v1), 2024-01-10
Supplement: Supplementary file 1 [file supplementary]

**Table-S1.** Mean absorbance values obtained by in-house IgG ELISA for detection of IgG, and IgG1, IgG2, IgG3 and IgG4 antibody isotypes in samples (serum/plasma) collected from 85 no-hospitalized COVID-19 convalescent subjects

|    | <b>ID</b> | <b>Specimen</b> | <b>Time (days)<br/>RT-qPCR &amp;<br/>Sample</b> | <b>ELISA<br/>IgG<br/>&gt;0.312</b> | <b>ELISA<br/>IgG1<br/>&gt;0.242</b> | <b>ELISA<br/>IgG2<br/>&gt;0.186</b> | <b>ELISA<br/>IgG3<br/>&gt;0.375</b> | <b>ELISA<br/>IgG4<br/>&gt;0.251</b> |
|----|-----------|-----------------|-------------------------------------------------|------------------------------------|-------------------------------------|-------------------------------------|-------------------------------------|-------------------------------------|
| 1  | BBMC102   | Serum           | Unknown                                         | 2.5619                             | 2.59                                | 0.172                               | 0.78                                | 0.119                               |
| 2  | BBMC103   | Serum           | Unknown                                         | 2.5235                             | 1.91                                | -0.02                               | 0.56                                | 0.023                               |
| 3  | BBMC104   | Serum           | Unknown                                         | 0.9734                             | 0.26                                | 0.036                               | 0.09                                | 0.078                               |
| 4  | BBMC105   | Serum           | 35                                              | 2.4548                             | 3.7                                 | 0.108                               | 1.315                               | 0.15                                |
| 5  | BBMC106   | Serum           | 35                                              | 0.8364                             | 0.14                                | 0.133                               | 0.04                                | 0.088                               |
| 6  | BBMC132   | Serum           | 32                                              | 2.1755                             | 3.01                                | 0.005                               | 0.37                                | 0.099                               |
| 7  | BBMC133   | Serum           | 37                                              | 1.0806                             | 0.01                                | 0.037                               | 0.06                                | 0.036                               |
| 8  | BBMC134   | Serum           | 32                                              | 0.822                              | 0.23                                | 0.166                               | 0.02                                | 0.15                                |
| 9  | BBMC135   | Serum           | 37                                              | 1.98                               | 0.31                                | 0.179                               | 0.185                               | -0.14                               |
| 10 | BBMC136   | Serum           | 38                                              | 0.045                              | 0.05                                | 0.09                                | 0.1                                 | 0.08                                |
| 11 | BBMC137   | Serum           | 34                                              | 1.037                              | 0.12                                | -0.018                              | 0.04                                | 0.006                               |
| 12 | HAM143    | Serum           | 1                                               | 2.851                              | 3.156                               | 0.003                               | 2.282                               | 0.029                               |
| 13 | BBMC148   | Serum           | 39                                              | 2.25                               | 0.684                               | 0.133                               | 0.32                                | 0.004                               |
| 14 | LMH151    | Serum           | 48                                              | 2.189                              | 1.097                               | 1.383                               | 1.037                               | 0.092                               |
| 15 | BSCM152   | Serum           | 45                                              | 1.194                              | 0.166                               | -0.246                              | 0.398                               | 0.009                               |
| 16 | LML153    | Serum           | 48                                              | 2.26                               | 1.958                               | -0.23                               | 0.747                               | 0.057                               |
| 17 | BBSM155   | Plasma          | 20                                              | 1.371                              | 0.58                                | 0.023                               | 0.18                                | 1.22                                |
| 18 | BBSM156   | Plasma          | 47                                              | 1.759                              | 0.515                               | 0.229                               | 0.060                               | 0.120                               |
| 19 | BBSM157   | Plasma          | 27                                              | 2.483                              | 0.6                                 | 0.154                               | 0.3                                 | 0.111                               |
| 20 | BBSM158   | Plasma          | 20                                              | 3.207                              | 2.5                                 | 0.088                               | 0.45                                | 0.164                               |
| 21 | BBSM159   | Plasma          | 26                                              | 3.056                              | 2.81                                | 0.063                               | 0.57                                | 0.355                               |
| 22 | BBSM160   | Plasma          | 31                                              | 1.897                              | 0.412                               | 0.027                               | 0.006                               | 0.056                               |
| 23 | BBSM161   | Plasma          | 22                                              | 2.958                              | 1.75                                | 0.079                               | 0.6                                 | 0.07                                |
| 24 | BBSM162   | Plasma          | 48                                              | 2.122                              | 0.48                                | -0.038                              | 0.320                               | 0.085                               |
| 25 | BBSM163   | Plasma          | 27                                              | 1.437                              | 0.575                               | -0.055                              | 0.090                               | 0.230                               |
| 26 | BBSM164   | Plasma          | 29                                              | 2.603                              | 1.26                                | 0.051                               | 0.3                                 | 0.26                                |
| 27 | BBSM165   | Plasma          | 30                                              | 2.196                              | 0.325                               | 0.027                               | 0.05                                | 0.13                                |
| 28 | BBSM166   | Plasma          | 44                                              | 1.783                              | 0.175                               | -0.045                              | 0.142                               | 0.114                               |
| 29 | BBSM167   | Plasma          | 22                                              | 1.798                              | 0.556                               | 0.051                               | 0.04                                | 0.035                               |
| 30 | BBSM170   | Plasma          | 48                                              | 3.140                              | 1.61                                | 0.036                               | 0.175                               | 0.315                               |
| 31 | BBSM171   | Plasma          | 41                                              | 2.477                              | 0.41                                | -0.034                              | 0.185                               | 0.300                               |
| 32 | BBSM173   | Plasma          | 33                                              | 3.204                              | 0.97                                | 0.047                               | 0.48                                | 0.025                               |
| 33 | BBSM176   | Plasma          | 42                                              | 2.512                              | 0.45                                | -0.041                              | 0.550                               | 0.028                               |
| 34 | BBSM177   | Plasma          | 36                                              | 2.200                              | 0.2                                 | -0.058                              | 0.13                                | 0.05                                |
| 35 | BBSM178   | Plasma          | 36                                              | 1.571                              | 0.165                               | 0.057                               | 0.24                                | 0.055                               |
| 36 | BBSM179   | Plasma          | 14                                              | 1.265                              | 0.01                                | -0.056                              | 0.079                               | 0.090                               |
| 37 | BBSM180   | Plasma          | 13                                              | 2.052                              | 0.05                                | -0.051                              | 0.041                               | 0.015                               |
| 38 | BBSM181   | Plasma          | 48                                              | 1.715                              | 0.06                                | -0.036                              | 0.055                               | 0.006                               |
| 39 | BBSM182   | Plasma          | 38                                              | 2.906                              | 0.36                                | -0.031                              | 0.15                                | 0.02                                |
| 40 | BBSM184   | Plasma          | 37                                              | 1.752                              | 0.77                                | -0.057                              | 0.13                                | -0.01                               |
| 41 | LCTC192   | Serum           | Unknown                                         | 0.977                              | 0.032                               | -0.047                              | 0.057                               | -0.056                              |
| 42 | BBMC193   | Plasma          | 54                                              | 2.539                              | 1.101                               | 0.017                               | 0.023                               | 0.026                               |
| 43 | BBMC195   | Plasma          | 61                                              | 3.329                              | 1.06                                | -0.007                              | 0.256                               | 0.246                               |
| 44 | BBSM199   | Serum           | 61                                              | 1.464                              | 0.086                               | 0.037                               | 0.023                               | -0.073                              |
| 45 | BBSM201   | Serum           | 29                                              | 0.544                              | 0.054                               | 0.047                               | 0.079                               | -0.088                              |
| 46 | BBSM207   | Plasma          | 54                                              | 2.576                              | 0.389                               | 0.0509                              | 0.129                               | -0.049                              |
| 47 | BBSM209   | Plasma          | 34                                              | 2.474                              | 0.297                               | 0.005                               | 0.062                               | 0.043                               |
| 48 | BBSM210   | Plasma          | 18                                              | 3.053                              | 0.732                               | 0.180                               | 0.033                               | 0.024                               |
| 49 | BBSM214   | Plasma          | 96                                              | 3.483                              | 2.695                               | 0.112                               | 2.710                               | -0.006                              |
| 50 | LCTC218   | Serum           | Unknown                                         | 1.253                              | -0.09                               | 0.060                               | 0.057                               | -0.018                              |
| 51 | BBMC220   | Plasma          | 69                                              | 3.326                              | 2.047                               | 0.012                               | 1.12                                | 0.018                               |
| 52 | BBSM229   | Plasma          | 35                                              | 2.103                              | 0.380                               | 0.216                               | 0.125                               | 0.000                               |
| 53 | BBSM231   | Plasma          | 28                                              | 2.33                               | 0.513                               | 0.034                               | 0.150                               | 0.072                               |
| 54 | UPR247    | Serum           | Unknown                                         | 0.448                              | -0.172                              | 0.012                               | -0.009                              | 0.0124                              |
| 55 | LV260     | Plasma          | 0                                               | 2.750                              | 1.054                               | 0.213                               | 0.185                               | 0.183                               |

|    |         |        |         |        |         |        |         |        |
|----|---------|--------|---------|--------|---------|--------|---------|--------|
| 56 | LV261   | Serum  | 0       | 3.185  | 2.652   | 0.098  | 2.125   | -0.006 |
| 57 | LV262   | Serum  | 0       | 2.655  | 0.689   | -0.219 | 0.13    | 0.112  |
| 58 | BBSM275 | Plasma | 84      | 3.534  | 1.177   | 0.074  | 0.045   | 0.253  |
| 59 | BBSM284 | Plasma | 84      | 3.205  | 0.935   | -0.013 | 0.147   | -0.065 |
| 60 | BSSM288 | Plasma | 116     | 1.948  | 0.275   | 0.103  | 0.051   | 0.126  |
| 61 | LCTC300 | Serum  | 25      | 0.802  | -0.006  | 0.123  | 0.006   | 0.119  |
| 62 | LCTC312 | Plasma | 14      | 2.755  | 0.496   | 0.056  | 0.121   | 0.038  |
| 63 | BBSM318 | Plasma | 15      | 3.205  | 1.631   | 0.050  | 0.189   | -0.079 |
| 64 | BBSM322 | Plasma | 33      | 3.500  | 2.09    | 0.469  | 0.312   | 0.014  |
| 65 | LCTC367 | Plasma | Unknown | 2.578  | 1.514   | 0.090  | 0.509   | 0.328  |
| 66 | LCTC374 | Serum  | Unknown | 1.1012 | 0.129   | 0.062  | 0.528   | 0.106  |
| 67 | LCTC375 | Serum  | Unknown | 2.938  | 2.049   | 0.053  | 0.360   | 0.524  |
| 68 | LCTC376 | Serum  | Unknown | 2.6602 | 0.646   | -0.016 | 0.031   | 0.054  |
| 69 | LCTC377 | Serum  | Unknown | 1.207  | -0.029  | 0.035  | -0.054  | 0.212  |
| 70 | UPR381  | Serum  | 36      | 2.149  | 0.834   | 3.166  | 1.514   | 0.029  |
| 71 | UPR382  | Plasma | Unknown | 1.51   | 0.567   | 0.086  | 0.064   | 0.211  |
| 72 | LCTC384 | Serum  | Unknown | 1.805  | 0.710   | 0.014  | 0.537   | -0.033 |
| 73 | BBSM386 | Plasma | 42      | 1.226  | 0.033   | 0.048  | -0.035  | 0.069  |
| 74 | BBSM390 | Plasma | 26      | 1.876  | 0.503   | 0.018  | 0.587   | 0.128  |
| 75 | BBSM391 | Plasma | 68      | 2.409  | 1.499   | -0.010 | 0.124   | -0.067 |
| 76 | BBSM393 | Plasma | 25      | 0.624  | 0.05565 | -0.002 | 0.040   | -0.077 |
| 77 | BBSM397 | Plasma | 20      | 0.791  | -0.016  | 0.079  | 0.086   | -0.073 |
| 78 | BBSM403 | Plasma | 23      | 1.658  | 0.292   | 0.022  | 0.035   | 0.113  |
| 79 | BBSM409 | Plasma | 116     | 2.506  | 1.23    | 0.113  | 0.419   | 0.105  |
| 80 | BBSM412 | Plasma | 84      | 2.703  | 1.75    | 0.029  | 0.379   | 0.073  |
| 81 | BBSM417 | Plasma | 29      | 1.179  | 0.283   | 0.028  | 0.508   | 0.092  |
| 82 | BBSM427 | Plasma | 139     | 0.748  | 0.38    | 0.017  | 0.144   | 0.09   |
| 83 | LCTC451 | Plasma | Unknown | 1.634  | 0.338   | 0.057  | 0.15205 | -0.048 |
| 84 | LCTC457 | Serum  | Unknown | 1.929  | 0.381   | 0.211  | 0.456   | 0.151  |
| 85 | LCTC471 | Plasma | Unknown | 1.445  | 0.387   | 0.017  | 0.069   | 0.074  |

**Table-S2.** Neutralization activity measured as surrogate virus neutralization percentage (sVNT%) against the Wild Type, Alpha (B.1.1.7), Delta (B.1.617.2), and Omicron (B.1.1.529) variant of concern were determined by C-Pass method in samples (serum/plasma) collected from 85 no-hospitalized COVID-19 convalescent subjects.

|    | ID      | Specimen | sVNT% > 30% |       |       |         |
|----|---------|----------|-------------|-------|-------|---------|
|    |         |          | WILD TYPE   | ALPHA | DELTA | OMICRON |
| 1  | BBMC102 | Serum    | 92          | 74    | 82    | 25      |
| 2  | BBMC103 | Serum    | 92          | 71    | 81    | 22      |
| 3  | BBMC104 | Serum    | 69          | 33    | 42    | 24      |
| 4  | BBMC105 | Serum    | 88          | 59    | 82    | 29      |
| 5  | BBMC106 | Serum    | 53          | 14    | 36    | 25      |
| 6  | BBMC132 | Serum    | 91          | 63    | 82    | 26      |
| 7  | BBMC133 | Serum    | 85          | 49    | 64    | 33      |
| 8  | BBMC134 | Serum    | 53          | 24    | 18    | 21      |
| 9  | BBMC135 | Serum    | 87          | 54    | 77    | 29      |
| 10 | BBMC136 | Serum    | 0           | -8    | 22    | 8       |
| 11 | BBMC137 | Serum    | 70          | 30    | 43    | 18      |
| 12 | HAM143  | Serum    | 96          | 90    | 95    | 24      |
| 13 | BBMC148 | Serum    | 92          | 63    | 79    | 22      |
| 14 | LMH151  | Serum    | 94          | 78    | 88    | 25      |
| 15 | BSCM152 | Serum    | 72          | 52    | 45    | 24      |
| 16 | LML153  | Serum    | 93          | 70    | 89    | 2       |
| 17 | BBSM155 | Plasma   | 40          | 9     | 21    | 17      |
| 18 | BBSM156 | Plasma   | 77          | 35    | 54    | 9       |
| 19 | BBSM157 | Plasma   | 75          | 35    | 58    | 18      |
| 20 | BBSM158 | Plasma   | 94          | 73    | 85    | 24      |
| 21 | BBSM159 | Plasma   | 96          | 82    | 90    | 24      |
| 22 | BBSM160 | Plasma   | 47          | 6     | 26    | 17      |
| 23 | BBSM161 | Plasma   | 91          | 63    | 80    | 23      |
| 24 | BBSM162 | Plasma   | 84          | 50    | 59    | 20      |
| 25 | BBSM163 | Plasma   | 66          | 30    | 36    | 24      |
| 26 | BBSM164 | Plasma   | 78          | 47    | 49    | 6       |
| 27 | BBSM165 | Plasma   | 69          | 35    | 49    | 6       |
| 28 | BBSM166 | Plasma   | 55          | 24    | 23    | 16      |
| 29 | BBSM167 | Plasma   | 58          | 29    | 48    | 8       |
| 30 | BBSM170 | Plasma   | 89          | 61    | 65    | 5       |
| 31 | BBSM171 | Plasma   | 77          | 37    | 56    | 15      |
| 32 | BBSM173 | Plasma   | 93          | 71    | 80    | 17      |
| 33 | BBSM176 | Plasma   | 93          | 57    | 77    | 22      |
| 34 | BBSM177 | Plasma   | 79          | 45    | 58    | 14      |
| 35 | BBSM178 | Plasma   | 71          | 36    | 47    | 18      |
| 36 | BBSM179 | Plasma   | 71          | 39    | 41    | 10      |
| 37 | BBSM180 | Plasma   | 78          | 54    | 51    | 16      |
| 38 | BBSM181 | Plasma   | 65          | 30    | 35    | 10      |
| 39 | BBSM182 | Plasma   | 94          | 74    | 82    | 31      |
| 40 | BBSM184 | Plasma   | 65          | 23    | 46    | 14      |
| 41 | LCTC192 | Serum    | 53          | 11    | 20    | 12      |
| 42 | BBMC193 | Plasma   | 51.3        | 23    | 32    | 7       |
| 43 | BBMC195 | Plasma   | 96          | 84    | 86    | 28      |
| 44 | BBSM199 | Serum    | 54          | 14    | 29    | 13      |
| 45 | BBSM201 | Serum    | 96          | -2    | 1     | 19      |
| 46 | BBSM207 | Plasma   | 86          | 23    | 63    | 13      |
| 47 | BBSM209 | Plasma   | 79          | 44    | 51    | 2       |
| 48 | BBSM210 | Plasma   | 92          | 65    | 76    | 15      |
| 49 | BBSM214 | Plasma   | 86          | 79    | 83    | 10      |
| 50 | LCTC218 | Serum    | 72          | 2     | 11    | 10      |

|    |         |        |      |    |    |    |
|----|---------|--------|------|----|----|----|
| 51 | BBMC220 | Plasma | 89.9 | 83 | 89 | 20 |
| 52 | BBSM229 | Plasma | 85   | 55 | 54 | 17 |
| 53 | BBSM231 | Plasma | 90   | 66 | 72 | 21 |
| 54 | UPR247  | Serum  | 19   | 14 | 0  | 17 |
| 55 | LV260   | Plasma | 81   | 58 | 61 | 13 |
| 56 | LV261   | Serum  | 97   | 91 | 94 | 24 |
| 57 | LV262   | Serum  | 86   | 59 | 72 | 21 |
| 58 | BBSM275 | Plasma | 97   | 93 | 96 | 14 |
| 59 | BBSM284 | Plasma | 91   | 70 | 67 | 18 |
| 60 | BSSM288 | Plasma | 77   | 51 | 64 | 20 |
| 61 | LCTC300 | Serum  | 56   | 35 | 42 | 7  |
| 62 | LCTC312 | Plasma | 83   | 44 | 70 | 15 |
| 63 | BBSM318 | Plasma | 92   | 73 | 58 | 7  |
| 64 | BBSM322 | Plasma | 94   | 66 | 79 | 2  |
| 65 | LCTC367 | Plasma | 92   | 28 | 36 | 10 |
| 66 | LCTC374 | Serum  | 44   | 87 | 92 | 41 |
| 67 | LCTC375 | Serum  | 98   | 47 | 73 | 10 |
| 68 | LCTC376 | Serum  | 94   | 24 | 23 | 10 |
| 69 | LCTC377 | Serum  | 50   | 43 | 58 | 11 |
| 70 | UPR381  | Serum  | 76   | 32 | 33 | 13 |
| 71 | UPR382  | Plasma | 72   | 58 | 62 | 12 |
| 72 | LCTC384 | Serum  | 87   | 48 | 54 | 10 |
| 73 | BBSM386 | Plasma | 71.4 | 62 | 74 | 21 |
| 74 | BBSM390 | Plasma | 92   | 66 | 75 | 15 |
| 75 | BBSM391 | Plasma | 92   | 19 | 28 | 7  |
| 76 | BBSM393 | Plasma | 65   | 23 | 37 | 13 |
| 77 | BBSM397 | Plasma | 72   | 48 | 57 | 12 |
| 78 | BBSM403 | Plasma | 88   | 74 | 82 | 18 |
| 79 | BBSM409 | Plasma | 38.3 | 70 | 81 | 20 |
| 80 | BBSM412 | Plasma | 92.6 | 19 | 34 | 21 |
| 81 | BBSM417 | Plasma | 73   | 20 | 32 | 14 |
| 82 | BBSM427 | Plasma | 51.8 | 42 | 70 | 21 |
| 83 | LCTC451 | Plasma | 81   | 70 | 76 | 18 |
| 84 | LCTC457 | Serum  | 86   | 25 | 32 | 7  |
| 85 | LCTC471 | Plasma | 31   | 58 | 76 | 15 |

**Table-S3.** Levels of IgG antibody subclasses to SARS-CoV-2 measured by in-house ELISAs and neutralizing percentages (sVNT%) measured by C-Pass surrogate virus neutralization test in serial samples collected from 12 COVID-19 convalescent subjects that received two doses of the mRNA vaccine (Pfizer-BioNTech or Moderna-1273).

| ID & Vaccine           | Sample | Time after 2 <sup>nd</sup> Vaccine dose | Date       | ELISA IgG >0.312 | ELISA IgG1 >0.242 | ELISA IgG2 >0.186 | ELISA IgG3 >0.375 | ELISA IgG4 >0.251 | sVNT% WT | sVNT% Alpha | sVNT% Delta | sVNT% Omicron |
|------------------------|--------|-----------------------------------------|------------|------------------|-------------------|-------------------|-------------------|-------------------|----------|-------------|-------------|---------------|
| <b>Pfizer-BioNTech</b> |        |                                         |            |                  |                   |                   |                   |                   |          |             |             |               |
| JJJ367                 | 1      | Baseline                                | 11/02/2020 | 2.578            | 1.510             | 0.090             | 0.509             | 0.313             | 92%      | 58%         | 77%         | 7%            |
|                        | 2      | 20 days                                 | 02/25/2021 | 2.467            | 3.522             | 0.068             | 0.158             | 0.612             | 97%      | 98%         | 97%         | 95%           |
|                        | 3      | 96 days                                 | 05/12/2021 | 2.004            | 1.028             | 0.013             | 0.021             | 0.523             | 97%      | 97%         | 96%         | 62%           |
| IDG313                 | 1      | Baseline                                | 01/12/2021 | 2.854            | 2.281             | 0.263             | 0.813             | 0.481             | 97%      | 83%         | 89%         | 10%           |
|                        | 2      | 16 days                                 | 03/04/2021 | 2.740            | 3.466             | 0.027             | 0.200             | 0.297             | 98%      | 98%         | 97%         | 98%           |
|                        | 3      | 134 days                                | 06/30/2021 | 2.312            | 1.392             | 0.079             | 0.024             | 0.294             | 96%      | 98%         | 96%         | 95%           |
| APR382                 | 1      | Baseline                                | 01/14/2021 | 0.194            | 0.025             | 0.062             | 0.001             | 0.016             | 39%      | 23%         | 35%         | 10%           |
|                        | 2      | 20 days                                 | 03/05/2021 | 2.591            | 3.037             | 0.076             | 0.027             | 0.004             | 97%      | 98%         | 97%         | 91%           |
|                        | 3      | 83 days                                 | 05/07/2021 | 1.784            | 0.462             | 0.035             | 0.016             | 0.026             | 96%      | 98%         | 95%         | 45%           |
| CRO384                 | 1      | Baseline                                | 12/16/2020 | 1.037            | 0.162             | 0.129             | 0.287             | 0.232             | 69%      | 44%         | 52%         | 7%            |
|                        | 2      | 23 days                                 | 02/10/2021 | 2.848            | 3.524             | 0.235             | 0.134             | 0.022             | 98%      | 98%         | 97%         | 96%           |
|                        | 3      | 112 days                                | 05/10/2021 | 1.456            | 0.075             | 0.016             | 0.047             | 0.012             | 97%      | 98%         | 96%         | 67%           |
| NV471                  | 1      | Baseline                                | 02/05/2021 | 0.692            | 0.145             | 0.095             | 0.099             | 0.015             | 24%      | 20%         | 19%         | 2%            |
|                        | 2      | 15 days                                 | 04/28/2021 | 2.028            | 1.651             | 0.694             | 0.198             | 0.010             | 98%      | 98%         | 97%         | 91%           |
|                        | 3      | 169 days                                | 09/29/2021 |                  | 0.105             | 0.024             | 0.040             | 0.016             | 97%      | 95%         | 95%         | 43%           |
| CIR511                 | 1      | Baseline                                | 01/27/2021 | 1.643            | 0.490             | 0.421             | 0.006             | 0.025             | 81%      | 55%         | 67%         | 9%            |
|                        | 2      | 26 days                                 | 03/17/2021 | 2.698            | 2.589             | 0.120             | 0.018             | 0.001             | 97%      | 98%         | 97%         | 75%           |
|                        | 3      | 83 days                                 | 05/13/2021 | 1.663            | 0.906             | 0.257             | 0.008             | 0.019             | 96%      | 97%         | 96%         | 52%           |
| JAF512                 | 1      | Baseline                                | 01/27/2021 | 0.539            | 0.004             | 0.058             | 0.022             | 0.701             | 46%      | 23%         | 43%         | 8%            |
|                        | 2      | 26 days                                 | 03/17/2021 | 2.693            | 2.815             | 0.026             | 0.104             | 0.786             | 89%      | 95%         | 93%         | 47%           |
|                        | 3      | 83 days                                 | 05/13/2021 | 1.826            | 0.610             | 0.029             | 0.031             | 0.652             | 96%      | 93%         | 94%         | 18%           |
| HEV218                 | 1      | Baseline                                | 11/2/2020  | 1.253            | 0.087             | 0.06              | 0.057             | 0.018             | 72%      | 29%         | 32%         | -1%           |
|                        | 2      | 20 days                                 | 02/25/2021 | 2.575            | 3.536             | 0.036             | 0.405             | 0.000             | 97%      | 98%         | 97%         | 89%           |
|                        | 3      | 96 days                                 | 05/12/2021 | 1.988            | 1.211             | 0.033             | 0.316             | 0.007             | 97%      | 98%         | 96%         | 76%           |
| <b>Moderna-1273</b>    |        |                                         |            |                  |                   |                   |                   |                   |          |             |             |               |
| CMV 294                | 1      | Baseline                                | 12/11/2020 | 1.535            | 0.010             | 0.005             | 0.038             | 0.012             | 90%      | 70%         | 72%         | 14%           |
|                        | 2      | 32 days                                 | 03/31/2021 | 2.399            | 1.180             | 0.099             | 0.006             | 0.154             | 98%      | 97%         | 96%         | 70%           |
|                        | 3      | 124 days                                | 07/01/2021 | 1.724            | 0.148             | 0.125             | 0.086             | 0.197             | 96%      | 97%         | 96%         | 54%           |
| RER 376                | 1      | Baseline                                | 12/18/2020 | 0.589            | 0.028             | 0.019             | 0.048             | 0.022             | 72%      | 34%         | 32%         | 1%            |
|                        | 2      | 18 days                                 | 03/12/2021 | 2.334            | 1.153             | 0.007             | 0.109             | 0.409             | 97%      | 98%         | 96%         | 88%           |
|                        | 3      | 74 days                                 | 05/07/2021 | 2.195            | 0.237             | 0.078             | 0.038             | 0.094             | 96%      | 98%         | 96%         | 63%           |
| NS-455                 | 1      | Baseline                                | 10/27/2020 | 0.415            | 0.028             | 0.024             | 0.215             | 0.005             | 33%      | 7%          | 9%          | 11%           |
|                        | 2      | 24 days                                 | 03/09/2021 | 2.261            | 0.426             | 0.104             | 0.155             | 0.050             | 97%      | 96%         | 96%         | 65%           |
|                        | 3      | 96 days                                 | 05/20/2021 | 1.697            | 0.034             | 0.166             | 0.024             | 0.059             | 96%      | 93%         | 94%         | 21%           |
| EM-457                 | 1      | Baseline                                | 10/30/2020 | 1.929            | 0.011             | 0.008             | 0.153             | 0.023             | 86%      | 62%         | 77%         | 10%           |
|                        | 2      | 23 days                                 | 06/14/2021 | 2.359            | 3.144             | 0.234             | 1.443             | 0.022             | 97%      | 98%         | 96%         | 98%           |
|                        | 3      | 117 days                                | 09/16/2021 | 2.670            | 2.257             | 0.168             | 0.32              | 0.065             | 98%      | 98%         | 96%         | 95%           |

**Table-S4.** Levels of IgG antibody subclasses to SARS-CoV-2 measured by in-house ELISAs and neutralizing activity measured by C-Pass a surrogate virus neutralization assay (sVNT%) in serial samples collected from 14 subjects without previous SARS-CoV-2 infection that received multiple mRNA vaccinations (Pfizer-BioNTech or Moderna-mRNA-1273).

| ID                                                                                                                                                | Sample | Time Point                    | Sample Date | ELISA IgG >0.312 | ELISA IgG1 >0.242 | ELISA IgG2 >0.186 | ELISA IgG3 >0.375 | ELISA IgG4 >0.251 | sVNT% WT | sVNT% Alpha | sVNT% Delta | sVNT% Omicron |
|---------------------------------------------------------------------------------------------------------------------------------------------------|--------|-------------------------------|-------------|------------------|-------------------|-------------------|-------------------|-------------------|----------|-------------|-------------|---------------|
| <b>Cohort-3a: Serial samples from no-previous SARS-CoV-2 infected subjects that received multiple mRNA vaccinations (Pfizer-BioNTech)</b>         |        |                               |             |                  |                   |                   |                   |                   |          |             |             |               |
| NM-249                                                                                                                                            | 1      | Baseline                      | 12/21/2020  | 0.007            | 0.064             | 0.019             | 0.017             | 0.059             | 19%      | -3%         | -5%         | 7%            |
|                                                                                                                                                   | 2      | 35 days 2 <sup>nd</sup> dose  | 02/24/2021  | 2.217            | 3.046             | 0.077             | 2.039             | 0.059             | 97%      | 90%         | 95%         | 33%           |
|                                                                                                                                                   | 3      | 31 days 3 <sup>rd</sup> dose  | 11/09/2021  |                  | 0.890             | 0.675             | 0.243             | 3.870             | 98%      | 97%         | 96%         | 74%           |
|                                                                                                                                                   | 4      | 180 days 3 <sup>rd</sup> dose | 05/03/2022  |                  | 1.191             | 1.829             | 0.158             | 3.920             | 98%      | 97%         | 96%         | 97%           |
|                                                                                                                                                   | 5      | 30 days Bivalent              | 10/11/2022  | 2.627            | 1.392             | 2.588             | 0.108             | 3.930             | 97%      | 96%         | 97%         | 98%           |
|                                                                                                                                                   | 6      | 180 days Bivalent             | 03/15/2023  | 2.171            | 0.314             | 0.463             | 0.011             | 3.510             | 97%      | 97%         | 97%         | 95%           |
| CS-116                                                                                                                                            | 1      | Baseline                      | 12/21/2020  | 0.057            | 0.011             | 0.018             | 0.006             | 0.011             | -1%      | -4%         | 0%          | 7%            |
|                                                                                                                                                   | 2      | 21 days 2 <sup>nd</sup> dose  | 03/04/2021  | 2.635            | 3.255             | 0.163             | 3.989             | 0.019             | 97%      | 95%         | 95%         | 66%           |
|                                                                                                                                                   | 3      | 31 days 3 <sup>rd</sup> dose  | 01/13/2022  |                  | 0.974             | 0.227             | 0.063             | 3.897             | 98%      | 98%         | 96%         | 94%           |
|                                                                                                                                                   | 4      | 180 days 3 <sup>rd</sup> dose | 10/11/2022  | 2.572            | 0.742             | 0.234             | 0.084             | 3.906             | 97%      | 97%         | 97%         | 96%           |
|                                                                                                                                                   | 5      | 30 days Bivalent              | 11/30/2022  | 2.440            | 1.996             | 0.672             | 0.103             | 3.893             | 96%      | 97%         | 97%         | 98%           |
|                                                                                                                                                   | 6      | 180 days Bivalent             | 04/11/2023  | 2.004            | 0.268             | 0.105             | 0.010             | 3.606             | 97%      | 98%         | 97%         | 97%           |
| LAC-117                                                                                                                                           | 1      | Baseline                      | 8/10/2020   | 0.082            | 0.020             | 0.053             | 0.028             | 0.041             | 2%       | -1%         | -2%         | 8%            |
|                                                                                                                                                   | 2      | 19 days 2 <sup>nd</sup> dose  | 03/04/2021  | 2.665            | 3.409             | 0.079             | 3.728             | 0.110             | 97%      | 92%         | 95%         | 46%           |
|                                                                                                                                                   | 3      | 31 days 3 <sup>rd</sup> dose  | 11/09/2021  |                  | 1.740             | 0.097             | 2.078             | 2.845             | 98%      | 97%         | 96%         | 97%           |
|                                                                                                                                                   | 4      | 330 days 3 <sup>rd</sup> dose | 10/11/2022  | 1.501            | 0.226             | 0.016             | 0.112             | 2.703             | 97%      | 96%         | 96%         | 39%           |
|                                                                                                                                                   | 5      | 30 days Bivalent              | 11/10/2022  | 2.185            | 1.641             | 0.004             | 0.084             | 3.905             | 97%      | 95%         | 98%         | 97%           |
|                                                                                                                                                   | 6      | 180 days Bivalent             | 04/13/2023  | 1.684            | 0.096             | 0.022             | 0.026             | 2.440             | 97%      | 97%         | 98%         | 88%           |
| AEM-254                                                                                                                                           | 1      | Baseline                      | 01/13/2021  | 0.009            | 0.099             | 0.009             | 0.017             | 0.018             | 18%      | -9%         | 1%          | 2%            |
|                                                                                                                                                   | 2      | 19 days 2 <sup>nd</sup> dose  | 03/04/2021  | 2.604            | 3.331             | 0.030             | 2.133             | 0.063             | 96%      | 92%         | 95%         | 39%           |
|                                                                                                                                                   | 3      | 43 days 3 <sup>rd</sup> dose  | 01/12/2022  |                  | 1.809             | 0.433             | 0.115             | 3.850             | 98%      | 98%         | 96%         | 92%           |
|                                                                                                                                                   | 4      | 420 days 3 <sup>rd</sup> dose | 03/15/2023  | 1.324            | 0.104             | 0.005             | 0.012             | 3.767             | 96%      | 94%         | 95%         | -1%           |
|                                                                                                                                                   | 5      | 30 days Bivalent              | 05/25/2023  | 2.182            | 1.432             | 1.648             | 0.136             | 3.801             | 98%      | 98%         | 96%         | 98%           |
|                                                                                                                                                   | 6      | 90 days Bivalent              | 08/10/2023  | 2.052            | 0.287             | 0.631             | 0.009             | 3.474             | 98%      | 98%         | 96%         | 98%           |
| <b>Cohort 3b: Single sample collected after the third Pfizer-BioNTech dose from no-previously infected individuals.</b>                           |        |                               |             |                  |                   |                   |                   |                   |          |             |             |               |
| LMM                                                                                                                                               | 1      | 351 days bivalent             | 09/13/2023  |                  | 1.610             | 0.199             | 0.026             | 3.678             | 98       | 98          | 96          | 98            |
| RRN                                                                                                                                               | 1      | 635 days 3 <sup>rd</sup> dose | 10/23/2023  |                  | 0.717             | 0.265             | 0.275             | 3.905             | 98       | 98          | 96          | 97            |
| AAR                                                                                                                                               | 1      | 723 days 3 <sup>rd</sup> dose | 10/23/2023  |                  | 0.146             | 0.230             | 0.098             | 0.510             | 98       | 98          | 96          | 95            |
| COM                                                                                                                                               | 1      | 633 days 3 <sup>rd</sup> dose | 10/23/2023  |                  | 0.738             | 0.236             | 0.256             | 2.709             | 98       | 98          | 96          | 98            |
| AEC                                                                                                                                               | 1      | 630 days 3 <sup>rd</sup> dose | 10/23/2023  |                  | 0.171             | 3.153             | 0.101             | 3.870             | 98       | 98          | 96          | 98            |
| JMJ                                                                                                                                               | 1      | 715 days 3 <sup>rd</sup> dose | 10/23/2023  |                  | 0.150             | 0.085             | 0.011             | 2.820             | 98       | 98          | 96          | 95            |
| MFG                                                                                                                                               | 1      | 715 days 3 <sup>rd</sup> dose | 10/23/2023  |                  | 0.286             | 0.482             | 0.006             | 3.975             | 98       | 98          | 96          | 98            |
| JGR                                                                                                                                               | 1      | 485 days 3 <sup>rd</sup> dose | 08/03/2023  |                  | 0.256             | 0.764             | 0.149             | 3.945             | 98       | 98          | 96          | 97            |
| <b>Cohort-4: No-previous SARS-CoV-2 infection, with inflammatory bowel disease (IBD) that received three mRNA vaccine doses (Pfizer-BioNTech)</b> |        |                               |             |                  |                   |                   |                   |                   |          |             |             |               |
| 006-V1                                                                                                                                            | 1      | Baseline                      | 04/14/2021  | 0.1272           | 0.005             | 0.021             | 0.020             | 0.054             | -11%     | 14%         | 5%          | 7%            |
|                                                                                                                                                   | 2      | 30 days 2 <sup>nd</sup> dose  | 06/09/2021  | 2.3997           | 1.710             | 0.123             | 0.236             | 0.026             | 97%      | 97%         | 99%         | 65%           |
|                                                                                                                                                   | 3      | 60 days 3 <sup>rd</sup> dose  | 03/04/2022  | 2.7545           | 2.341             | 0.927             | 0.097             | 3.475             | 98%      | 97%         | 96%         | 97%           |
|                                                                                                                                                   | 4      | 180 days 3 <sup>rd</sup> dose | 07/05/2022  | 2.4298           | 0.312             | 0.096             | 0.019             | 3.524             | 98%      | 97%         | 96%         | 92%           |
| 013-V1                                                                                                                                            | 1      | Baseline                      | 04/15/2021  | 0.0011           | 0.023             | 0.097             | 0.004             | 0.008             | -20%     | 4%          | 2%          | 10%           |
|                                                                                                                                                   | 2      | 15 days 2 <sup>nd</sup> dose  | 05/28/2021  | 1.6659           | 0.150             | 0.103             | 0.369             | 0.005             | 88%      | 60%         | 57%         | 12%           |
|                                                                                                                                                   | 3      | 60 days 3 <sup>rd</sup> dose  | 12/09/2021  | 2.3597           | 0.315             | 0.134             | 0.274             | 0.008             | 98%      | 93%         | 95%         | 23%           |
|                                                                                                                                                   | 4      | 180 days 3 <sup>rd</sup> dose | 04/06/2022  |                  | 0.020             | 0.207             | 0.11              | 0.007             | 91%      | 74%         | 86%         | 0%            |
| 014-V1                                                                                                                                            | 1      | Baseline                      | 04/16/2021  | 0.0126           | 0.008             | 0.034             | 0.008             | 0.009             | -5%      | -7%         | -1%         | 2%            |
|                                                                                                                                                   | 2      | 15 days 2 <sup>nd</sup> dose  | 05/28/2021  | 2.2356           | 1.278             | 0.006             | 0.633             | 0.015             | 97%      | 92%         | 96%         | 42%           |
|                                                                                                                                                   | 3      | 60 days 3 <sup>rd</sup> dose  | 01/13/2022  | 2.0671           | 0.282             | 0.011             | 0.094             | 1.683             | 98%      | 97%         | 96%         | 50%           |
|                                                                                                                                                   | 4      | 180 days 3 <sup>rd</sup> dose | 05/13/2022  |                  | 0.115             | 0.016             | 0.015             | 0.560             | 96%      | 93%         | 94%         | 10%           |
| 016-V1                                                                                                                                            | 1      | Baseline                      | 04/16/2021  | 0.0075           | 0.005             | 0.096             | 0.003             | 0.004             | -15%     | -3%         | -6%         | 6%            |
|                                                                                                                                                   | 2      | 15 days 2 <sup>nd</sup> dose  | 05/26/2021  | 2.3267           | 2.482             | 0.081             | 0.705             | 0.018             | 97%      | 97%         | 98%         | 59%           |
|                                                                                                                                                   | 3      | 60 days 3 <sup>rd</sup> dose  | 03/01/2022  | 2.6183           | 2.083             | 0.331             | 0.039             | 3.588             | 98%      | 98%         | 96%         | 98%           |
|                                                                                                                                                   | 4      | 180 days 3 <sup>rd</sup> dose | 07/05/2022  | 2.1966           | 0.205             | 0.017             | 0.014             | 1.931             | 98%      | 98%         | 96%         | 82%           |



(A)

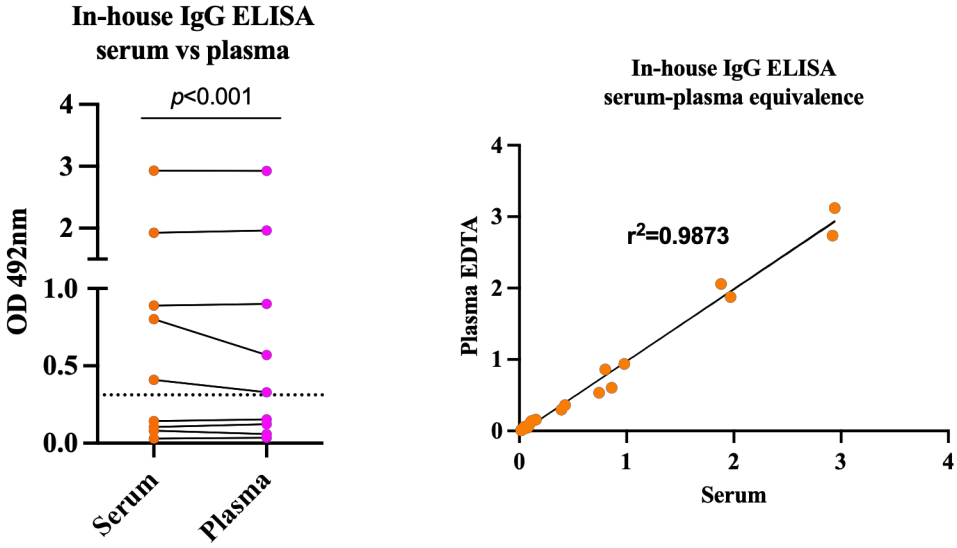

(B)

**Reproducibility of in-house IgG ELISA**

| Sample | N  | Mean $A_{492}$ | Repeatability |                  |                                |                  |
|--------|----|----------------|---------------|------------------|--------------------------------|------------------|
|        |    |                | (Within-Run)  |                  | Within-Laboratory <sup>a</sup> |                  |
|        |    |                | SD            | % CV             | SD                             | % CV             |
| NC     | 30 | 0.022          | 0.021         | N/A <sup>b</sup> | 0.0026                         | N/A <sup>b</sup> |
| HPC    | 30 | 2.476          | 0.211         | 8.52             | 0.219                          | 8.84             |
| NS-1   | 6  | 0.049          | 0.011         | N/A <sup>b</sup> | 0.014                          | N/A <sup>b</sup> |
| NS-2   | 6  | 0.043          | 0.016         | N/A <sup>b</sup> | 0.032                          | N/A <sup>b</sup> |
| NS-3   | 6  | 0.042          | 0.024         | N/A <sup>b</sup> | 0.035                          | N/A <sup>b</sup> |
| NS-4   | 6  | 0.062          | 0.005         | N/A <sup>b</sup> | 0.006                          | N/A <sup>b</sup> |
| PS-1   | 6  | 2.085          | 0.011         | 0.527            | 0.075                          | 3.59             |
| PS-2   | 6  | 2.37           | 0.05          | 2.109            | 0.012                          | 0.506            |
| PS-3   | 6  | 2.235          | 0.015         | 0.671            | 0.15                           | 6.71             |
| PS-4   | 6  | 3.17           | 0.057         | 1.79             | 0.28                           | 8.83             |

<sup>a</sup> Includes repeatability (Within-run), between-run and between-day variability.

<sup>b</sup> Not applicable

HPC: High positive control, NS: Negative serum, PC: Positive serum

NC: Negative control

**Figure-S1. Deming analysis for serum-plasma equivalence and reproducibility of the in house IgG-ELISA.** (A) Deming regression analysis was performed on paired 10 plasma and serum specimens collected from the same individual to demonstrate the equivalence in the assays results for both specimens. (B) Intra-assay and inter-assay reproducibility of the in-house IgG ELISA was determined from three independent assays and 30 repeats of controls or negative and positive samples.
